# Supplementary material for: DNA dendrimer-based nanocarriers for targeted Co-delivery and controlled release of multiple chemotherapeutic drugs
Source: Royal Society of Chemistry journal article supplement (doi:10.1039/d4ra07839j), 2025-01-01
Supplement: d4ra07839j2.pdf [file d4ra07839j2.pdf]

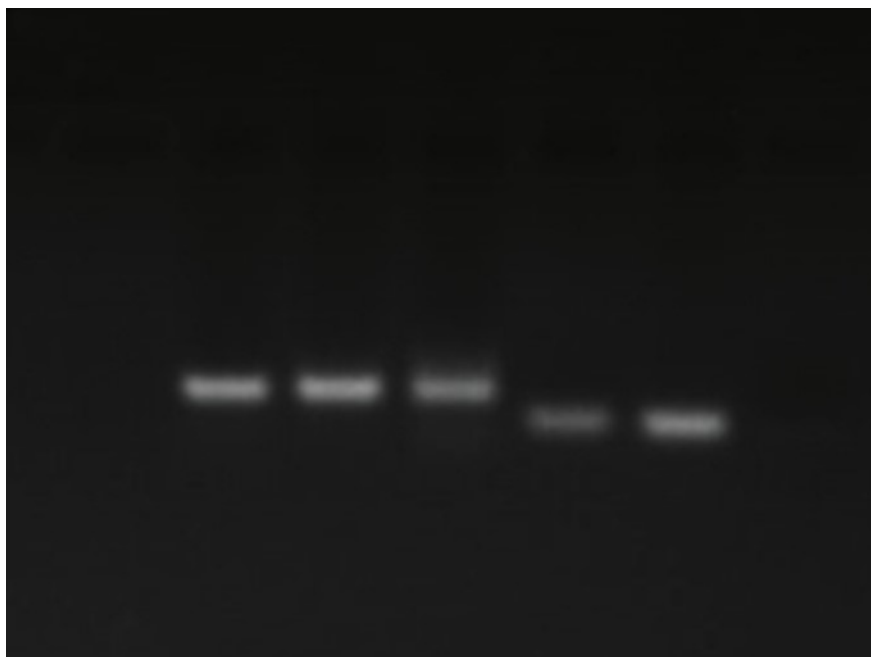

**Experiment result of agarose gel electrophoresis: Lane 1: 2  $\mu$ M G0; Lane 2: 2  $\mu$ M Y1; Lane 3: 2  $\mu$ M Y2; Lane 4: 2  $\mu$ M aptamer MUC1; Lane 5: 2  $\mu$ M aptamer VEGF (Run buffer: 1  $\times$  TAE; 12.5 V/cm; 20 min).**

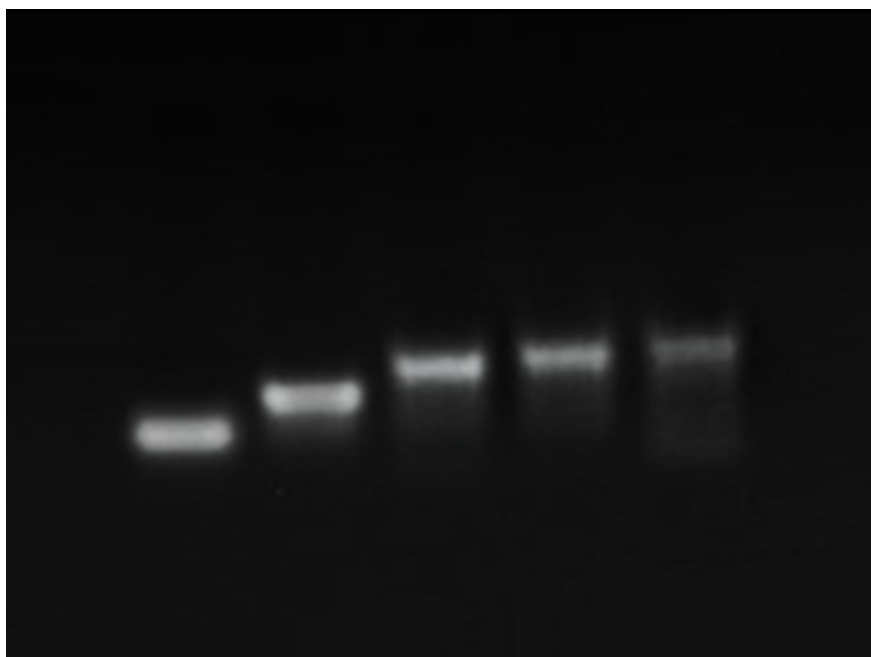

**Electrophoretic analysis of different generations of DNA dendrimers. Lane 1, 2  $\mu$ M G0; Lane 2, 0.5  $\mu$ M G1; Lane 3, 0.2  $\mu$ M G2; Lane 4, 0.14  $\mu$ M ASO-DDN; Lane 5, 90.9 nM ASO-Apt-DDN. Electrophoresis was carried out in 1  $\times$  TAE buffer at 12.5 V/cm for 20 min.**

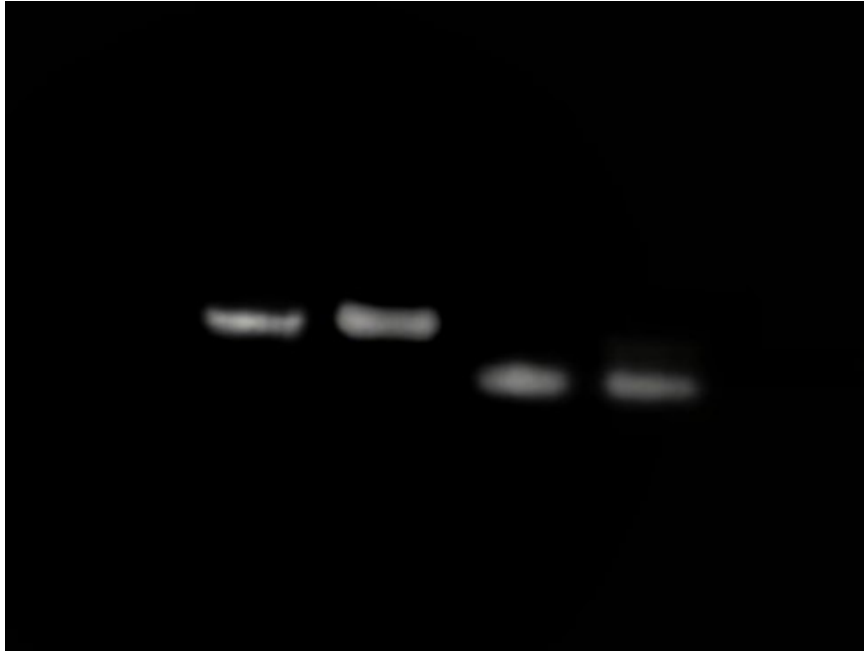

**Electrophoretic analysis of DNA dendrimers under various incubation conditions. Lane 1, 10 nM DDN; Lane 2, 20 nM DDN incubated in a PBS buffer at 37 °C for 2 h; Lane 3, 20 nM DDN incubated in a PBS buffer containing 5 mM GSH at 37 °C for 2 h; Lane 4, 20 nM DDN incubated in a PBS buffer containing 15 mM GSH at 37 °C for 2 h. Electrophoresis was carried out in 1 × TAE buffer at 12.5 V/cm for 20 min.**
